# Supplementary material
Source: PubMed Central journal article supplement (PMC3270092)
Supplement: NIHMS349122-supplement-YWC_IGF2_Supp_v1.pdf [file NIHMS349122-supplement-YWC_IGF2_Supp_v1.pdf]

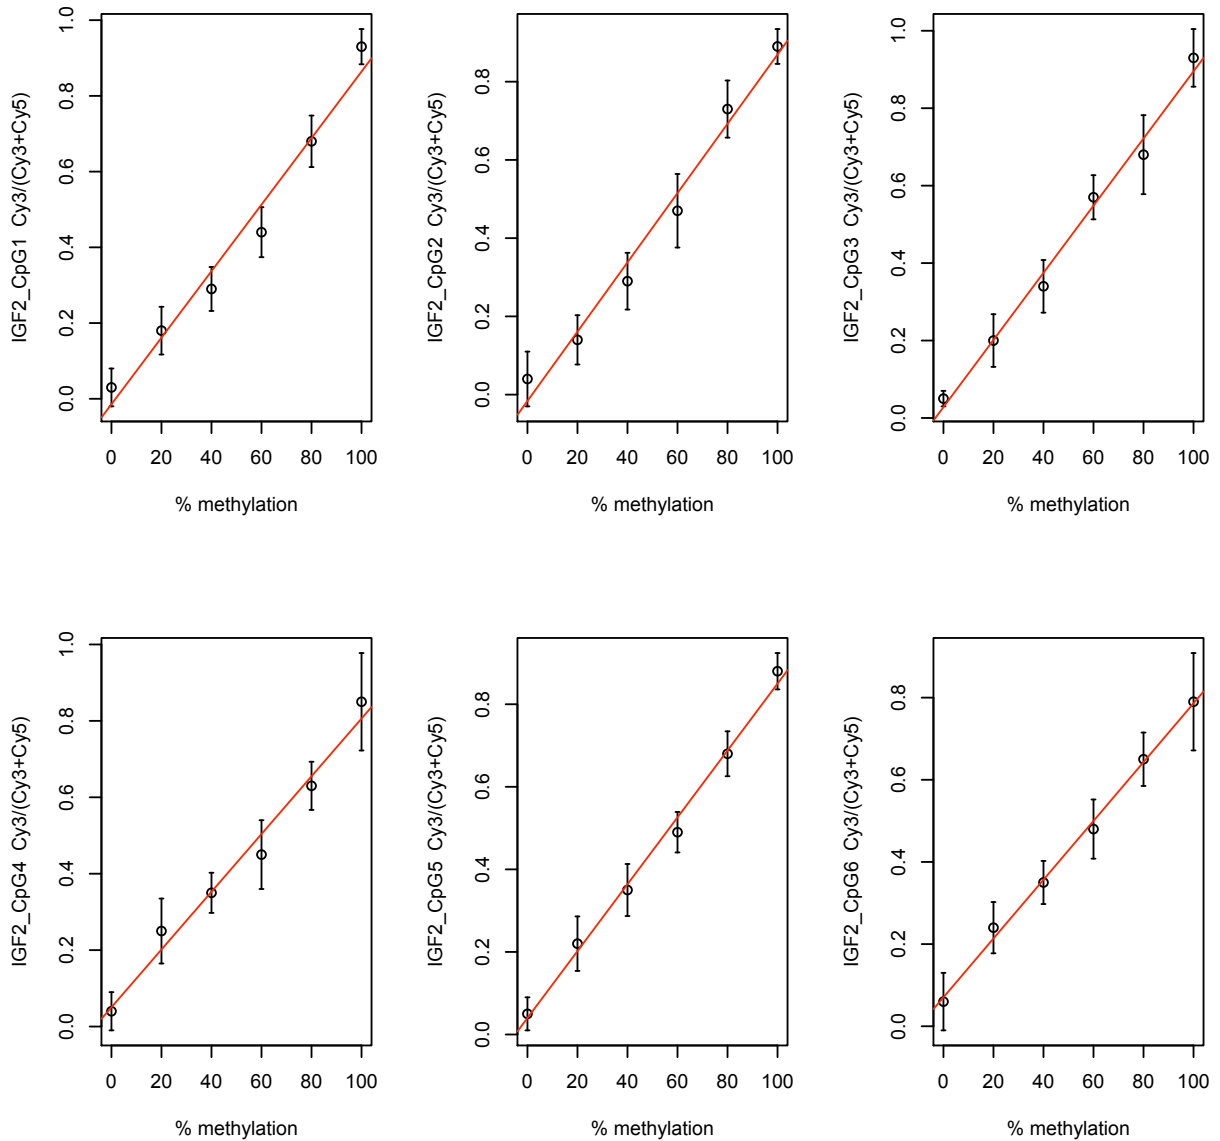

**Supplementary Figure 1:** The calibration curves of cytosine methylation levels. A total of 36 LDR primers were designed to interrogate the methylation status of 12 individual CpG dinucleotide sites at IGF2 and H19 DMRs. Synthetic DNA templates of methylated and unmethylated sequences were mixed in various ratios and followed by bisulfite/PCR/LDR/-Universal Array assay treatment. Six, three and three cytosines were analyzed at each of the IGF2, H19CBS1 and H19CBS6 loci. Each experiment was repeated at least three times.

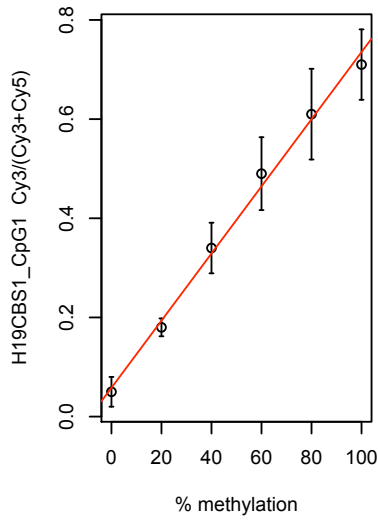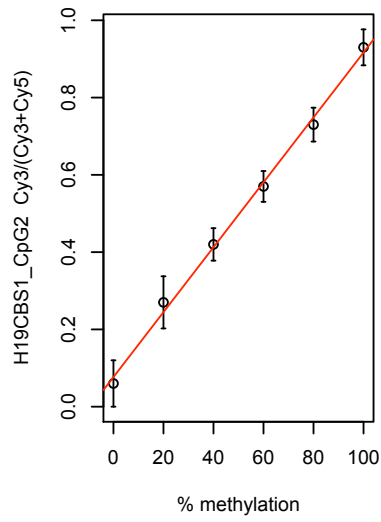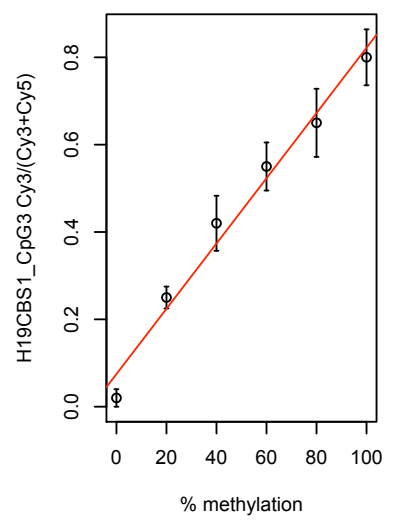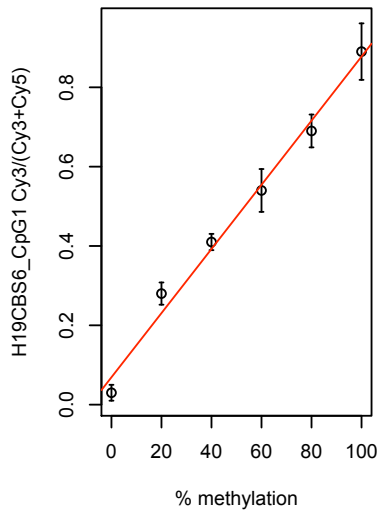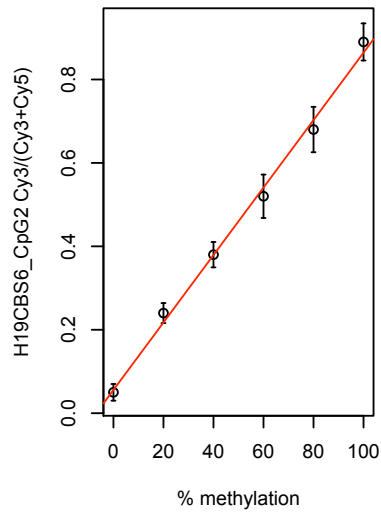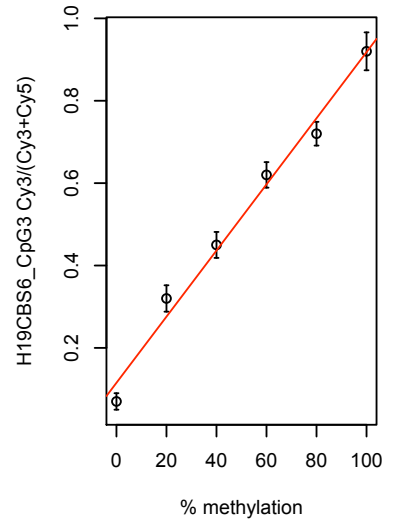

Supplementary Figure 1: (continue)

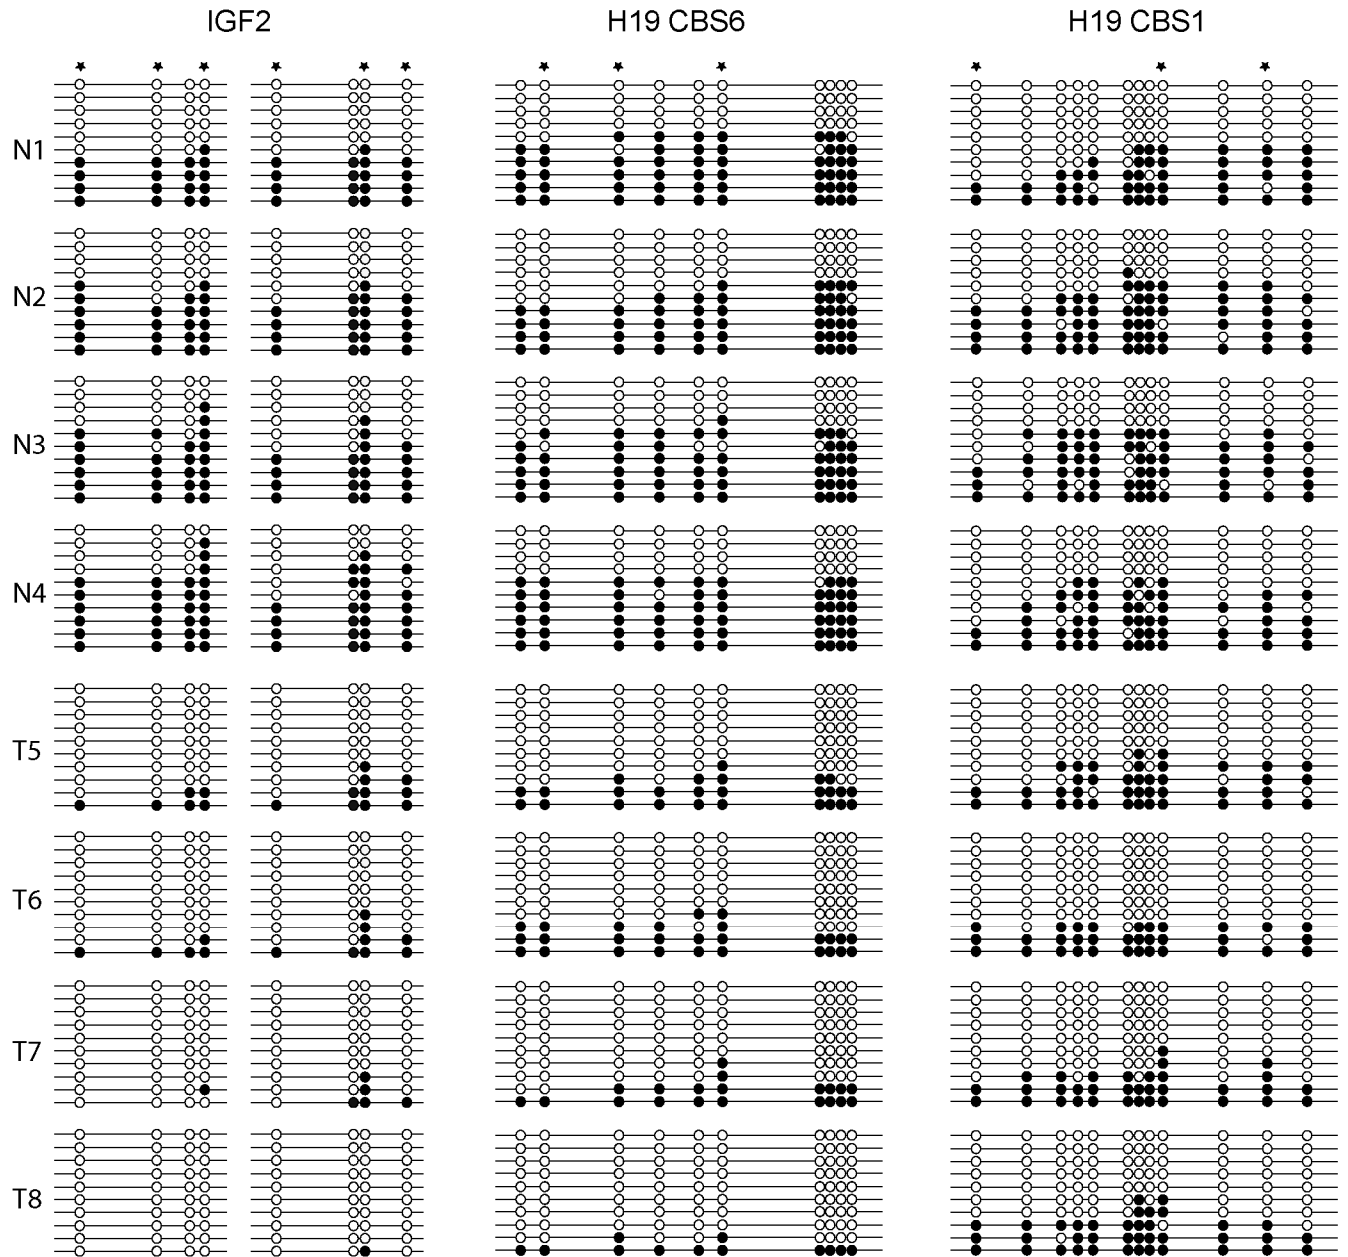

**Supplementary Figure 2:** Bisulfite sequencing of eight genomic DNA samples extracted from normal (N) and cancerous (T) colorectal tissues. Genomic DNAs were treated with sodium bisulfite, PCR amplified and subcloned before sequencing. Ten clones were picked and analyzed for each DNA sample. Each line represents an individual sequencing result in a given sample. Solid and open circles indicate methylated and unmethylated cytosines at CG dinucleotides, respectively. The cytosines analyzed by bisulfite/PCR/LDR/Universal array were indicated with stars.

**A.**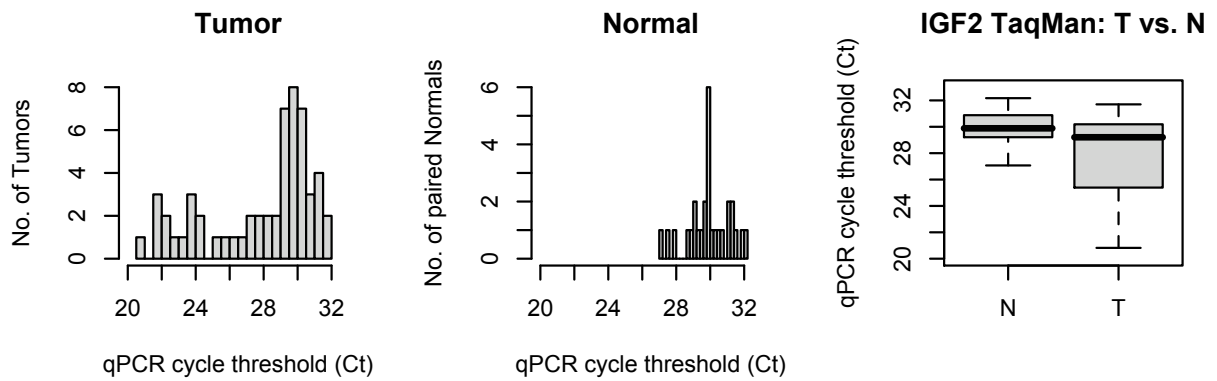**B.**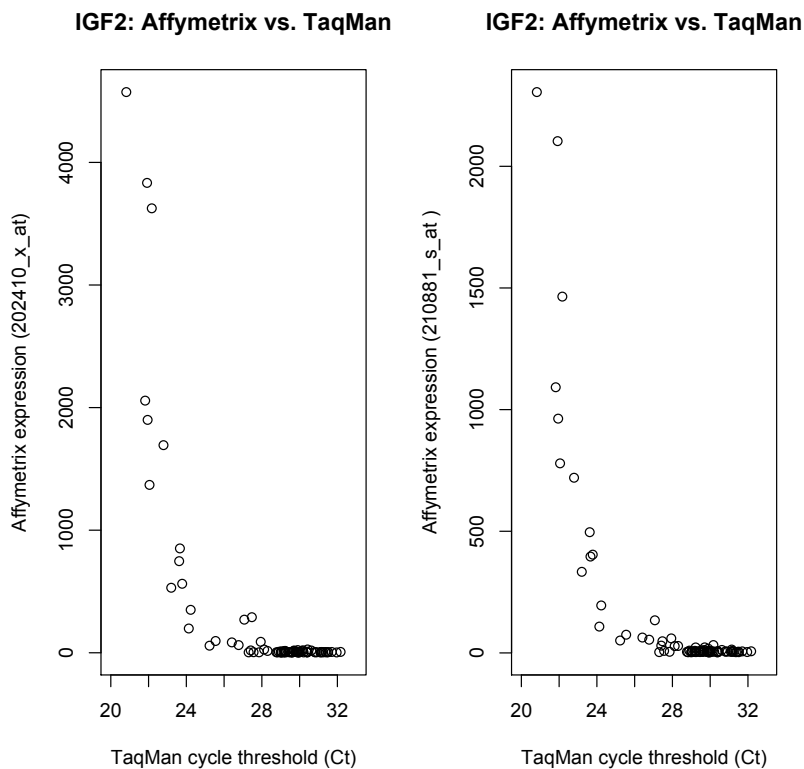

**Supplementary Figure 3:** Quantitative real-time RT-PCR (TaqMan) was performed in 61 primary colorectal tumors and 29 matched normal colonic tissues to determine IGF2 RNA levels. TaqMan primer-probe set HS01005963\_m1 (Applied Biosystems, CA) spanning IGF2 exon 3-4 boundary was used for the experiment. (A) The distributions of IGF2 RNA levels in CRC tumor and normal tissues. Gene expression is shown in qPCR cycle threshold (Ct) value. The increased IGF2 expression is tumor-specific ( $p = 0.0073$ ). (B) The correlations of IGF2 expression levels in 61 colorectal tumors measured by Affymetrix HG-U133A2 array and TaqMan assay. The gene expression levels determined by Affymetrix probe sets (202410\_x\_at and 210881\_s\_at) were consistently identified using real-time RT-PCR assay ( $p < 0.0001$ ).

Sample C0472A; Chromosome: 11

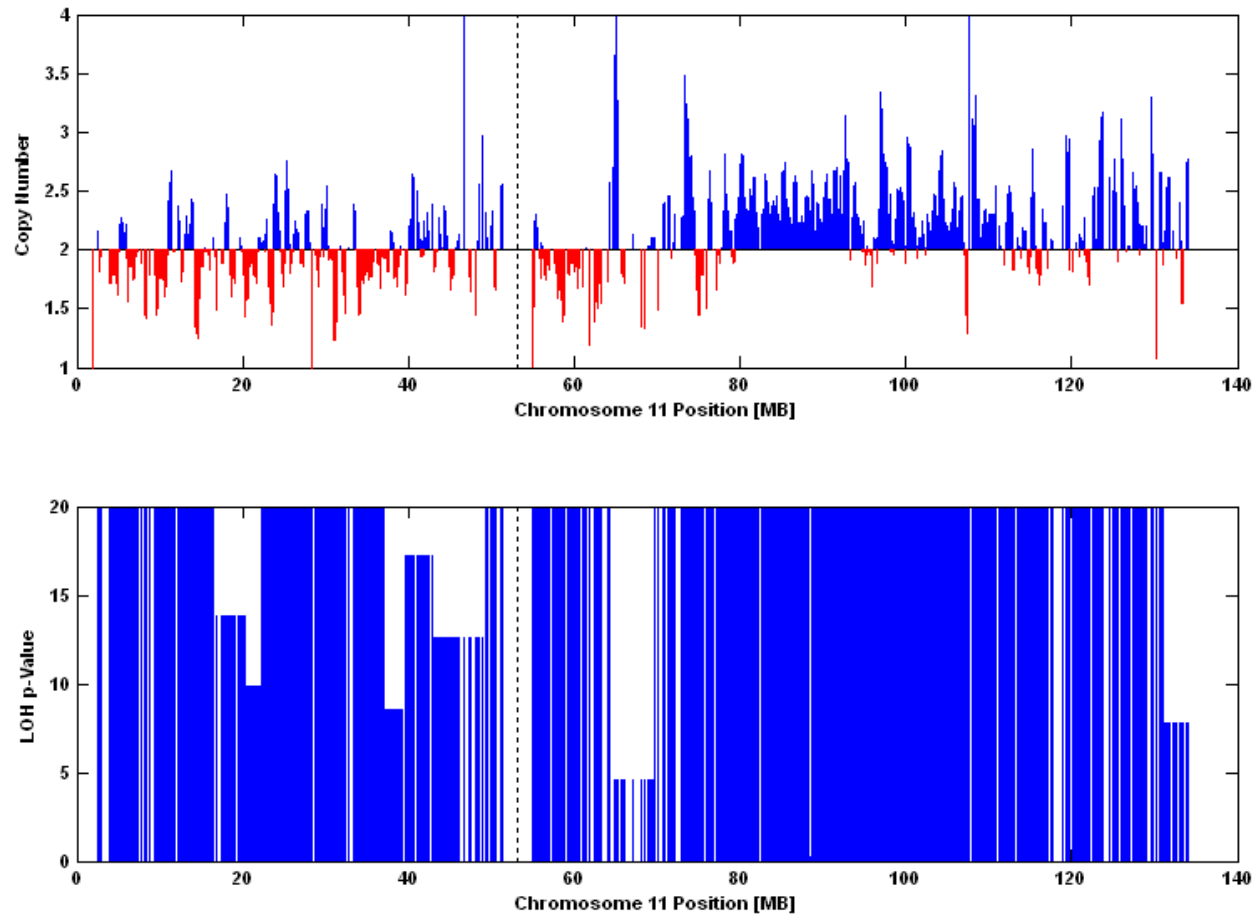

**Supplementary Figure 4:** An example of copy neutral LOH or UPD at the IGF2 (11p15) locus in a colorectal tumor.

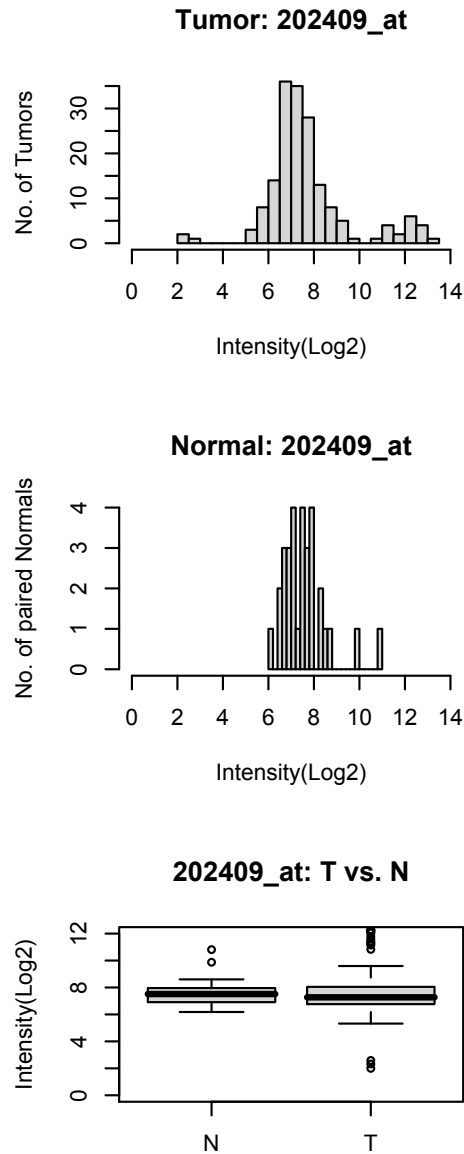

**Supplementary Figure 5:** The distribution of IGF2 expression levels in 167 primary CRC and 32 matched normal colonic tissues. The gene expression levels were measured using HG-U133A2 array probe set 202409\_at. No tumor-specific differential IGF2 expression ( $p = 0.566$ ) was observed.

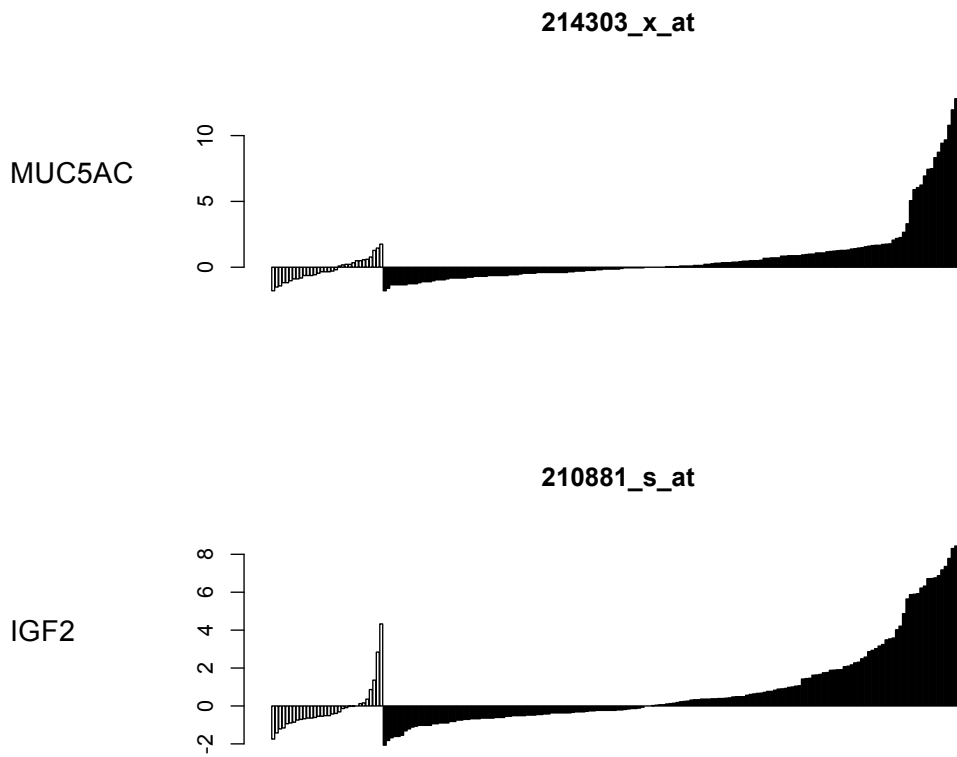

**Supplementary Figure 6:** IGF2 was the first candidate pair identified by COPA. The gene expression data of 167 primary CRC and 32 normal colorectal tissues were employed in the study. White and black colors represent the gene expression levels of normal and tumor samples, respectively.

## Supplementary Table 1

### PCR primers (methylation) Sequences

|              |                                                          |
|--------------|----------------------------------------------------------|
| IGF2_1 RP    | CGCTGCCAACTACCGCACATCGGGGTTTTATTTTTTTAGGAAGTATAGTTAT     |
| IGF2_1 FP    | CGCTGCCAACTACCGCACATCACCCCTTCTATTAACAAACTACCCTATTC       |
| IGF2_2 RP    | CGCTGCCAACTACCGCACATCTGTGGGAGGAGGTGGATTTTAGT             |
| IGF2_2 FP    | CGCTGCCAACTACCGCACATCCCTCAAATACCTAAAACACTCACCTC          |
| H19_CBS1 RPb | CGCTGCCAACTACCGCACATCGTATAGGTATTTTTGGAGGTTTTTTATTTAGT    |
| H19_CBS1 FPc | CGCTGCCAACTACCGCACATCCGCATAAATATCTATCTCTAACAACCCCTC      |
| H19_CBS6 RP  | CGCTGCCAACTACCGCACATCTTGAGGGTTGGGGAGATGAGATAT            |
| H19_CBS6 FP  | CGCTGCCAACTACCGCACATCCCAAAAAAACTTAAACTATAATATATAAACCTACA |

### LDR primers (methylation) Sequences

|                   |                                                                                   |
|-------------------|-----------------------------------------------------------------------------------|
| IGF2_1 49C        | cy3TTTTTTTAGGAAGTATAGTTACGTCGTTTTTTTATTGGTTTTT                                    |
| IGF2_1 49T        | cy5GTTTTATTTTTTTTAGGAAGTATAGTTATGTTGTTTTTTTATTGGTTTTT                             |
| IGF2_1 148C       | cy3GGTGTTTGGAGGTGGAGGAGGTTTTTATATTTT                                              |
| IGF2_1 148T       | cy5GGTGTTTGGAGGTGGAGGAGGTTTTTATATTTT                                              |
| IGF2_1 177C       | cy3TTTCGTGTTATGATTTTTTTAAGGCGGGTTATTC                                             |
| IGF2_1 177T       | cy5TTTTTATATTTTCGTGTTATGATTTTTTTAAGGTGGGTATTT                                     |
| IGF2_1 49Com(Z3)  | pGTTAAGTAGAGTTGTGTGTTTAGTGGTTTTTGTGGGGCCGTAAGCCCGTATGGCAGATCAA                    |
| IGF2_1 148Com(Z4) | pGTGTTATGATTTTTTTAAGGTGGGTATTTCGTGTGTTTTATGGCCGTGCTGGGGACAAGTCAA                  |
| IGF2_1 177Com(Z5) | pGTGTGTTTTTTTTATTTTTTAGTGTAGGTAGAAGTTTTATTTTTATTTAGGTTGCAACGGGCTGGTCAACGTCAA      |
| IGF2_2 46C        | cy3GGAGGTGGATTTTAGTTTTAGTTTTAGGGTTTTGAATC                                         |
| IGF2_2 46T        | cy5GGAGGTGGATTTTAGTTTTAGTTTTAGGGTTTTGAATT                                         |
| IGF2_2 156C       | cy3TGTGTGGTTTTGTGGTTTTAGGCGATTTTAGC                                               |
| IGF2_2 156T       | cy5GTTGTTGTGGTTTTGTGGTTTTAGGCGATTTTAGT                                            |
| IGF2_2 205C       | cy3TTAGAATTGAGGTTGGTAGTTAGTTTTAGTTTTAGTTTTAATTGC                                  |
| IGF2_2 205T       | cy5TTTTAGAATTGAGGTTGGTAGTTAGTTTTAGTTTTAGTTTTAATTGT                                |
| IGF2_2 46Com(Z6)  | pGTTGTTAGTTTTAGTTTTTGTGTTAGTTTGTGTTTTATAGTTTGGAGTTTTAGTAGCATCATGGGGGAAAGCTTCGTCAA |
| IGF2_2 156Com(Z7) | pGTTTTTAGAATTGAGGTTGGTAGTTAGTTTTAGTTTTAGTTTTAATTGCCGTTTGCGGTCGTCCTTGCTCAA         |
| IGF2_2 205Com(Z8) | pGAGGTAGAGAGGTGAGTGTGTTTTAGGTATTTTTGAGGGATTGCCGCACCGTCCGTCATCTCAA                 |



**Supplementary Table 1** (continue)

LDR primers (methylation) Sequences

|                      |                                                                     |
|----------------------|---------------------------------------------------------------------|
| H19 CBS6 79C         | Cy3TGGATGATGGGGATTTCCGGTTTTAGC                                      |
| H19 CBS6 79T         | Cy5TTTTTGGATGATGGGGATTTTGGTTTTAGT                                   |
| H19 CBS6 132C        | Cy3TTGGTAGGTATAGAAATTGGGGTTTTTGC                                    |
| H19 CBS6 132T        | Cy5TTTTGGTAGGTATAGAAATTGGGGTTTTTGT                                  |
| H19 CBS6 194C        | Cy3GTTTTTTTTTTTTGTTTTATTATTCCGGATGGTATAGAATC                        |
| H19 CBS6 194T        | Cy5ATGTTTTTTTTTTTTGTTTTATTATTCCGGATGGTATAGAATT                      |
| H19 CBS6 79Com(Z12)  | pGTGAGGTTTTTTTTTATAGGGTTTTTGGTAGGTATAGAAAGACGCACCGCAACAGGCTGTCAA    |
| H19 CBS6 132Com(Z13) | pGTAGTATATGGGTATTTGTGGATGTTTTTTTTTTTGTTCATCGCTGCAAGTACCGCACTCAA     |
| H19 CBS6 194Com(Z14) | pGGTTGTAAGTGTGGATTTAAAAGTGGTTGCGGGCTGGGACGTGCAGACCGTTCAA            |
| H19 CBS1 57C         | Cy3GTTTTTTTATTTAGTTTTGGATGTTAGTTTTATTAAGGGC                         |
| H19 CBS1 152C        | Cy3GGAATTAGAAGTGGTCGCGCGGC                                          |
| H19 CBS1 213C        | Cy3TCGAGTATGTTTGGTTGGGGTTTTATTTATAGAAAC                             |
| H19 CBS1 57T         | Cy5GGTTTTTTTATTTAGTTTTGGATGTTAGTTTTATTAAGGGT                        |
| H19 CBS1 152T        | Cy5CGTGTGGAATTAGAAGTGGTCGTGTGGT                                     |
| H19 CBS1 213T        | Cy5GTTTGAGTATGTTTGGTTGGGGTTTTATTTATAGAAAT                           |
| H19 CBS1 57Com(Z33)  | pGGTTTATTTTGTGATTTTATTAAGGGAGGTTTCGCGATTTTCGACTCAAGCGGCTCTTT        |
| H19 CBS1 152Com(Z34) | pGGTAGTGTAGGTTTATATATTATAGTTTGGATGTTTGGTTGGCGCAATGGTAGGTGAGCAAGCAGA |
| H19 CBS1 213Com(Z35) | pGTTTTAGGTTTTTTAGGTTAGGTGTTGTATTGGTTTTTCGTCCCCGTTACCTAGGCGATCAGA    |

RT-PCR / LDR primers Sequences

|                |                                           |
|----------------|-------------------------------------------|
| IGF2_820_For   | CCCCCACAACAACCCTCTTAAA                    |
| IGF2_820_Rev   | GGTCGTGCCAATTACATTTTCATTTG                |
| IGF2_820_Com   | CCCCAGAAATCACAGGTGGGCACGTGCG              |
| Vic_IGF2_820_G | VIC-ATAATGAGTCCCTGAACCAGCAAAGAGAAAAGAAGGG |
| Ned_IGF2_820_A | NED-TGAGTCCCTGAACCAGCAAAGAGAAAAGAAGGA     |
